# Supplementary material
Source: PubMed Central journal article supplement (PMC5423112)
Supplement: cdd201730x1.pdf [file cdd201730x1.pdf]

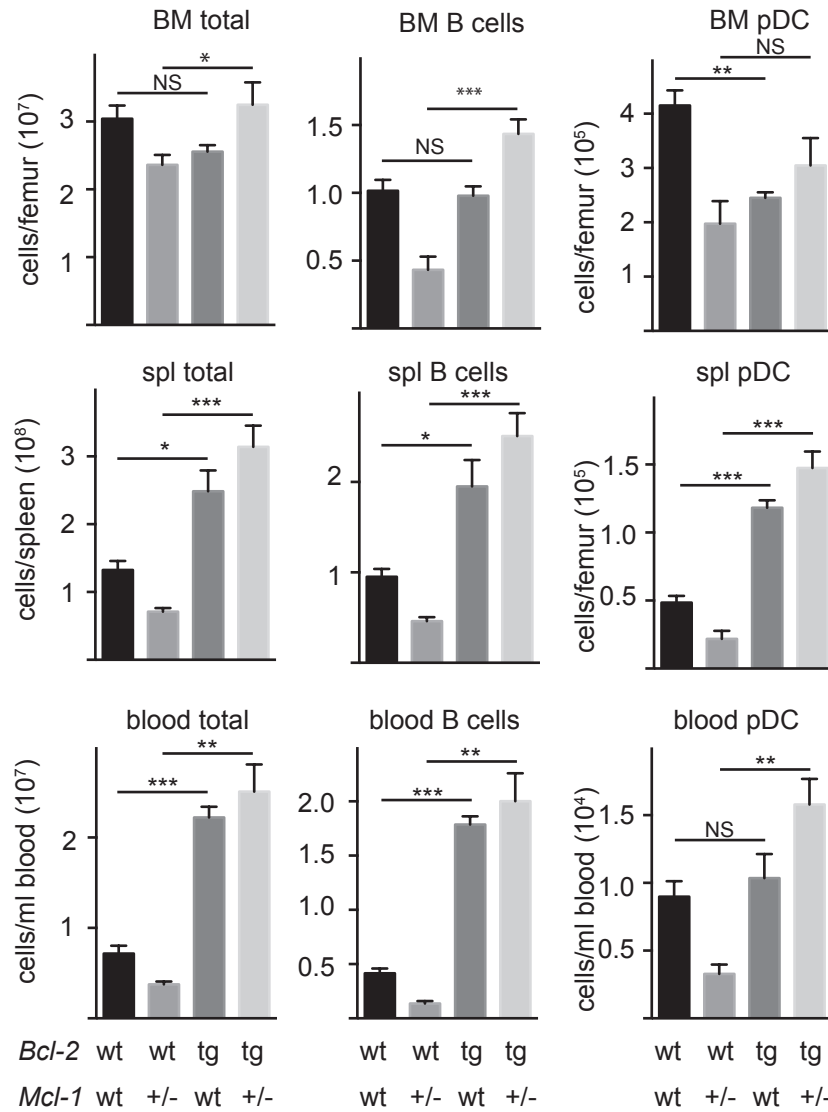

**Supplementary Figure 1: B cell and pDC populations in spleen and blood are increased significantly more by BCL-2 overexpression than those present in BM.** Haplo-insufficient *Mcl-1*<sup>+/-</sup> mice were bred to BCL-2 tg mice to generate B6 (wt), *Mcl-1*<sup>+/-</sup>, BCL-2 tg and *Mcl-1*<sup>+/-</sup>;BCL-2 tg. BM chimeras were generated from resultant offspring. BM, spleen (also shown Fig 2), and blood were collected from 8wk old male mice and the numbers of total live, B cells and pDC enumerated by PI staining and flow cytometry. Data shown is of n=4 animals; mean ± SEM analyzed using a 2-tailed Student's t test. \*P < 0.05, \*\*P < 0.01, \*\*\*P < 0.001
