# Supplementary material
Source: PubMed Central journal article supplement (PMC5423112)
Supplement: cdd201730x2.pdf [file cdd201730x2.pdf]

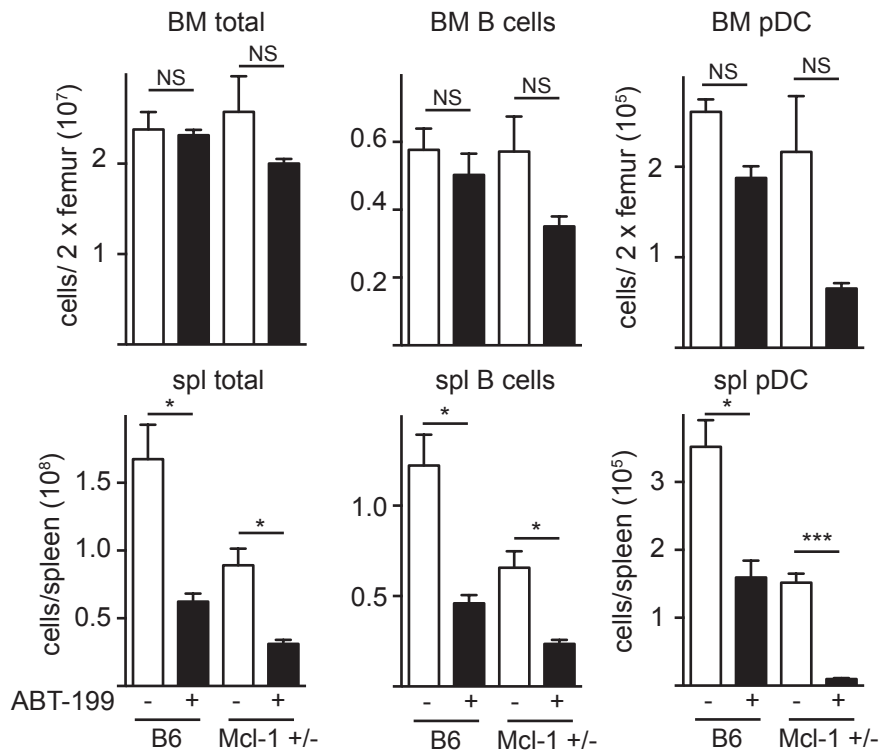

**Supplementary Figure 2: B cells and pDC populations in spleen are significantly more reduced by ABT-199 treatment than those present in BM.** B6 (wt) or Mcl-1<sup>+/-</sup> mice were gavaged with a single 100mg/kg body weight dose of ABT-199 or vehicle, as a control. After 24h BM and spleen (also shown figure 3) were recovered and the numbers of total live, B cells and pDC enumerated by PI staining and flow cytometry. Data shown is of n=4 animals; mean ± SEM analyzed using a 2-tailed Student's t test. \*P < 0.05, \*\*P < 0.01, \*\*\*P < 0.001
